# Supplementary material for: Electrochemical synthesis of polymer microgels
Source: Royal Society of Chemistry journal article supplement (doi:10.1039/c5py00365b), 2015-01-01
Supplement: c5py00365b1.pdf [file c5py00365b1.pdf]

# Electronic Supplementary Information

## Electrochemical Synthesis of Polymer Microgels

Suting Yan, Qingshi Wu, Aiping Chang, Fan Lu, Hai-Chao Xu, and Weitai Wu\*

*State Key Laboratory for Physical Chemistry of Solid Surfaces, The Key Laboratory for Chemical Biology of Fujian Province, and Department of Chemistry, College of Chemistry and Chemical Engineering, Xiamen University, Xiamen 361005, Fujian, China*

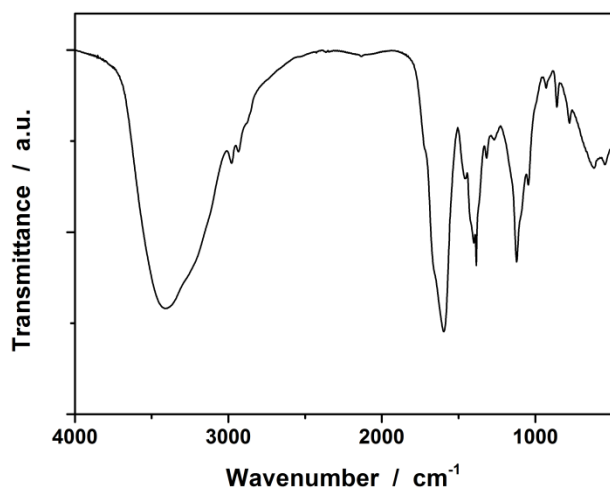

**Figure S1.** IR spectrum of the purified PNIPAM microgels.

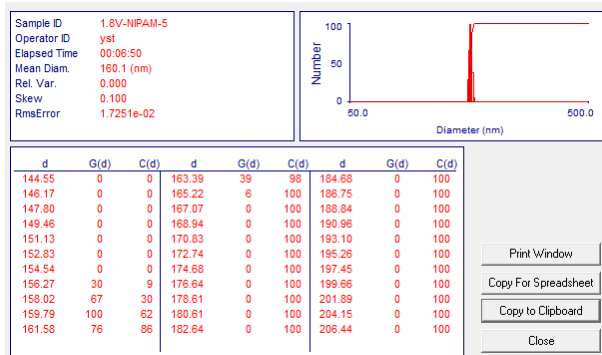

**Figure S2.** A screenshot showing DLS size distribution of PNIPAM microgels.

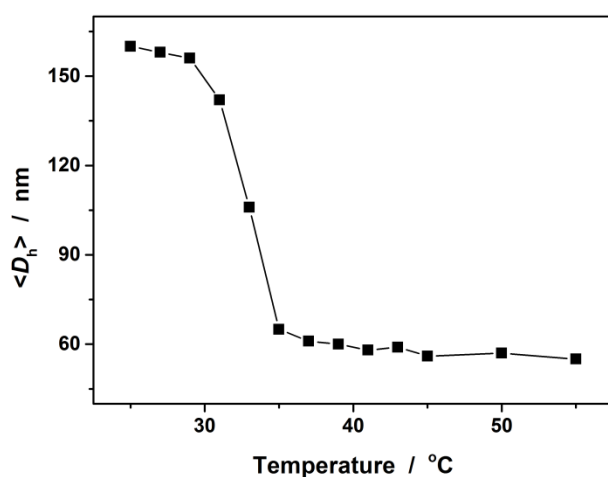

**Figure S3.** Temperature-dependent  $\langle D_h \rangle$  of PNIPAM microgels.

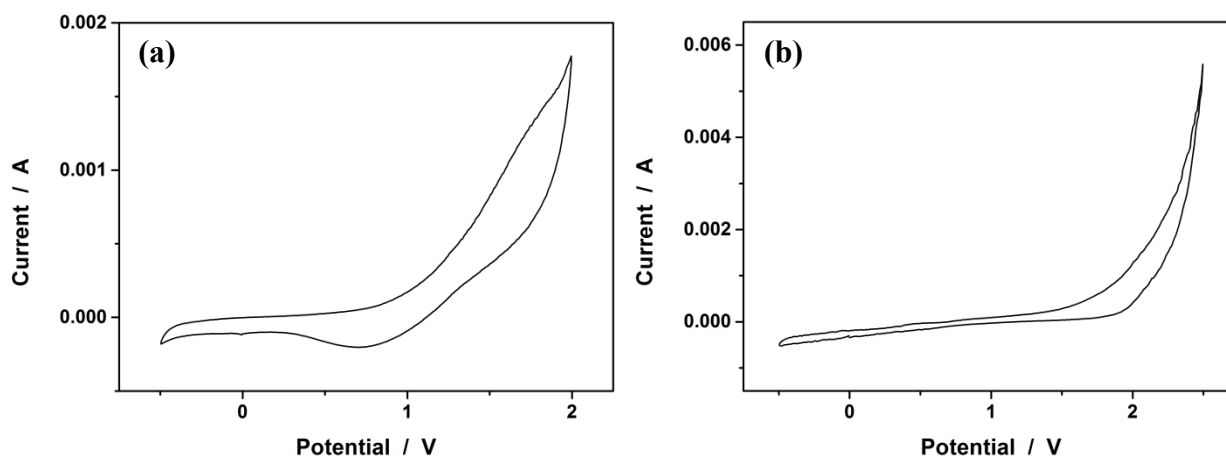

**Figure S4.** Typical cyclic voltammograms of (a) NIPAM ( $1.0 \times 10^{-3}$  mol) and (b) MBAAm ( $5.0 \times 10^{-5}$  mol) in pure CH<sub>3</sub>CN (20.0 mL).

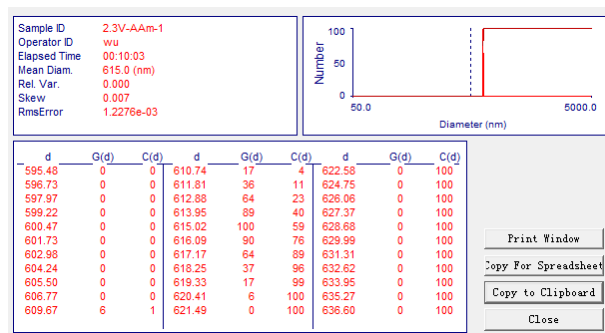

**Figure S5.** A screenshot showing DLS size distribution of PAAm microgels.

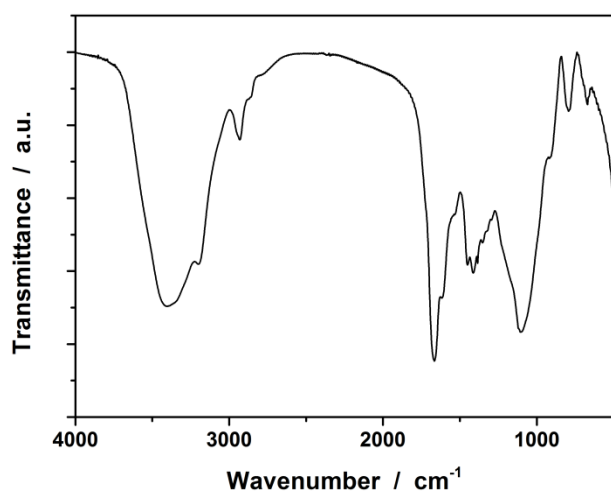

**Figure S6.** IR spectrum of the purified PAAm microgels.

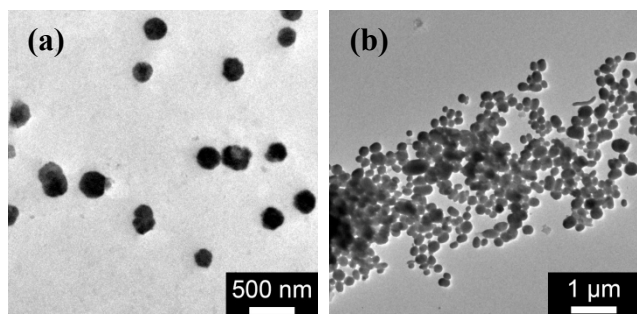

**Figure S7.** TEM images of PAAm microgels synthesized at a potentiostat of (a) +2.5 V and (b) +2.6 V versus Ag/AgCl, respectively. All microgels were harvested after 3hs' reaction.

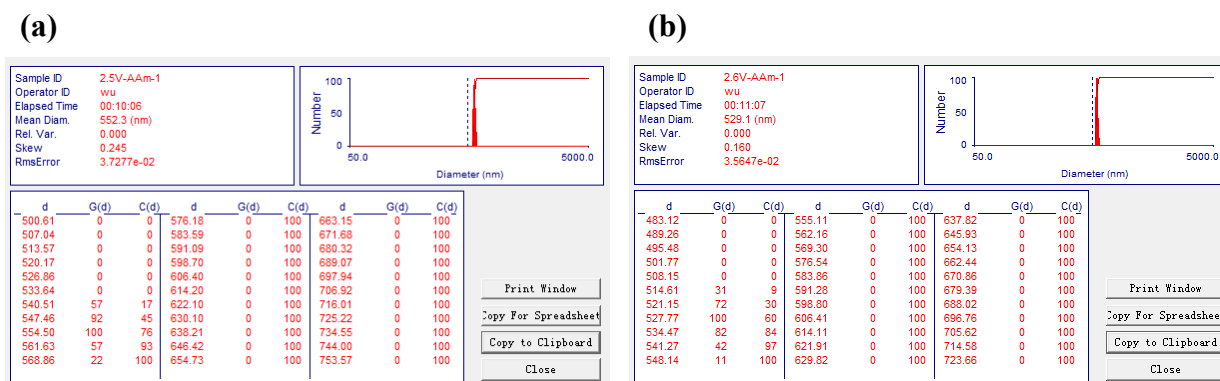

**Figure S8.** Typical screenshots showing DLS size distribution of PAAm microgels, which were synthesized at a potentiostat of (a) +2.5 V and (b) +2.6 V *versus* Ag/AgCl, and harvested after 3hs' reaction.

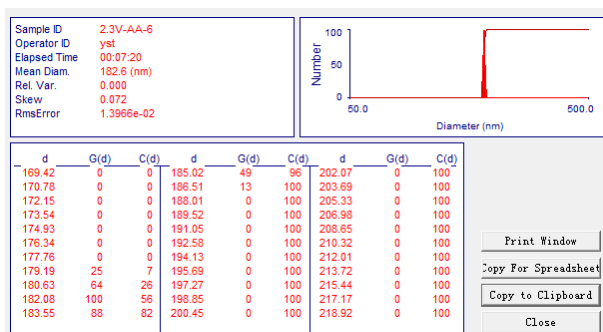

**Figure S9.** A screenshot showing DLS size distribution of PAA microgels.

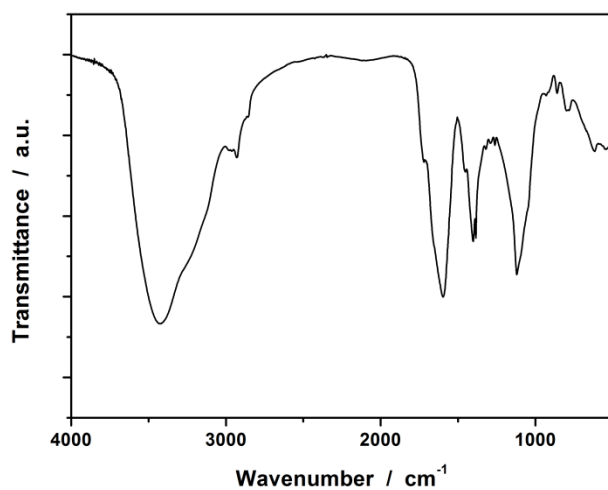

**Figure S10.** IR spectrum of the purified PAA microgels.
